# Supplementary material for: An experimental and master-equation modeling study of the kinetics of the reaction between resonance-stabilized (CH3)2CCHCH2 radical and molecular oxygen
Source: Royal Society of Chemistry journal article supplement (doi:10.1039/d1cp02210e), 2021-01-01
Supplement: d1cp02210e1.pdf [file d1cp02210e1.pdf]

Electronic Supporting Information for:

# An Experimental and Master-Equation Modeling Study for the Kinetics of the Reaction between Resonance-Stabilized $(\text{CH}_3)_2\text{CCHCH}_2$ Radical and Molecular Oxygen

*Satya P. Joshi, Timo T. Pekkanen, Prasenjit Seal, Raimo S. Timonen, Arkke J. Eskola\**

*Molecular Science, Department of Chemistry, University of Helsinki, P.O. Box 55(A.I. Virtasen  
aukio 1), FIN-00014, Helsinki, Finland*

*\*corresponding author: arkke.eskola@helsinki.fi*

## Table of content

|                        |                  |
|------------------------|------------------|
| <b>Table S1</b> .....  | <b>S3</b>        |
| <b>Figure S1</b> ..... | <b>S4 – S5</b>   |
| <b>Figure S2</b> ..... | <b>S6</b>        |
| <b>Table S2</b> .....  | <b>S7 – S9</b>   |
| <b>Table S3</b> .....  | <b>S10 – S11</b> |

**Table S1.** The experimental conditions and bi-exponential fitting parameters for intermediate temperature range measurements of reaction (1a, -1a).<sup>a</sup> Statistical uncertainties shown are  $1\sigma$ .

| <b>T<br/>(K)</b> | <b><math>P_{\text{He}}</math><br/>(Torr)</b> | <b><math>\lambda_1</math><br/>(<math>\text{s}^{-1}</math>)</b> | <b><math>\lambda_2</math><br/>(<math>\text{s}^{-1}</math>)</b> | <b><math>B</math></b> | <b><math>C</math></b> | <b><math>D</math></b> |
|------------------|----------------------------------------------|----------------------------------------------------------------|----------------------------------------------------------------|-----------------------|-----------------------|-----------------------|
| 325              | 0.86                                         | $174.4 \pm 2.9$                                                | $15.2 \pm 1.3$                                                 | 78.7                  | $1553.1 \pm 12.9$     | $163.0 \pm 9.4$       |
| 325              | 0.86                                         | $246.1 \pm 4.1$                                                | $17.8 \pm 1.6$                                                 | 60.9                  | $1105.3 \pm 10.4$     | $82.8 \pm 5.2$        |
| 330              | 0.88                                         | $267.8 \pm 7.2$                                                | $18.4 \pm 1.8$                                                 | 193.1                 | $1075.3 \pm 18.3$     | $104.5 \pm 7.2$       |
| 335              | 0.90                                         | $192.6 \pm 3.6$                                                | $11.8 \pm 0.9$                                                 | 80.6                  | $1305.6 \pm 11.9$     | $203.1 \pm 8.2$       |
| 337              | 0.90                                         | $218.2 \pm 6.0$                                                | $15.3 \pm 1.0$                                                 | 200.3                 | $1167.2 \pm 16.8$     | $231.9 \pm 9.8$       |
| 338              | 0.91                                         | $225.3 \pm 5.6$                                                | $17.2 \pm 1.2$                                                 | 267.4                 | $1877.1 \pm 23.4$     | $333.9 \pm 15.2$      |
| 344              | 0.92                                         | $221.1 \pm 5.8$                                                | $17.2 \pm 0.6$                                                 | 186.9                 | $1387.0 \pm 18.7$     | $452.0 \pm 11.5$      |
| 348              | 0.94                                         | $211.4 \pm 6.2$                                                | $16.0 \pm 0.6$                                                 | 229.4                 | $1479.8 \pm 21.6$     | $612.1 \pm 14.1$      |
| 353              | 0.96                                         | $190.5 \pm 21.2$                                               | $17.4 \pm 1.6$                                                 | 248.0                 | $575.6 \pm 30.8$      | $352.2 \pm 23.9$      |
| 356              | 0.96                                         | $228.0 \pm 12.1$                                               | $16.4 \pm 0.4$                                                 | 278.1                 | $1025.6 \pm 29.5$     | $947.1 \pm 15.9$      |
| 356 <sup>b</sup> | 1.22                                         | $224.6 \pm 98.7$                                               | $8.5 \pm 1.3$                                                  | 39.1                  | $61.0 \pm 15.3$       | $52.2 \pm 3.3$        |
| 358              | 0.97                                         | $269.6 \pm 57.9$                                               | $14.9 \pm 1.6$                                                 | 598.8                 | $466.6 \pm 58.2$      | $395.5 \pm 24.5$      |
| 361              | 0.48                                         | $182.8 \pm 11.1$                                               | $16.6 \pm 0.5$                                                 | 170.9                 | $659.6 \pm 19.6$      | $663.2 \pm 14.4$      |
| 361              | 0.96                                         | $292.1 \pm 15.4$                                               | $15.1 \pm 0.4$                                                 | 162.8                 | $601.8 \pm 19.2$      | $500.7 \pm 7.3$       |
| 361 <sup>b</sup> | 1.22                                         | $208.7 \pm 83.5$                                               | $9.1 \pm 1.1$                                                  | 25.4                  | $39.7 \pm 9.6$        | $53.8 \pm 3.1$        |
| 361 <sup>c</sup> | 3.61                                         | $217.5 \pm 60.6$                                               | $23.5 \pm 2.2$                                                 | 26.9                  | $38.6 \pm 5.2$        | $53.8 \pm 4.4$        |
| 361 <sup>c</sup> | 5.58                                         | $251.6 \pm 86.3$                                               | $26.2 \pm 2.1$                                                 | 29.3                  | $35.8 \pm 6.1$        | $60.8 \pm 4.4$        |
| 362              | 0.97                                         | $287.2 \pm 23.3$                                               | $16.3 \pm 0.3$                                                 | 324.8                 | $958.3 \pm 56.7$      | $1357.3 \pm 15.7$     |
| 367              | 0.71                                         | $299.0 \pm 40.8$                                               | $15.7 \pm 0.4$                                                 | 262.7                 | $567.8 \pm 58.7$      | $867.3 \pm 14.7$      |
| 373              | 0.76                                         | $383.6 \pm 67.3$                                               | $15.5 \pm 0.3$                                                 | 458.6                 | $760.7 \pm 126.8$     | $2050.7 \pm 18.5$     |
| 373              | 1.21                                         | $414.2 \pm 71.4$                                               | $14.8 \pm 0.3$                                                 | 446.5                 | $684.3 \pm 100.8$     | $1773.2 \pm 16.6$     |

<sup>a</sup> Xe-lamp with a sapphire window was used for detection, Pyrex-glass reactor (id = 1.65 cm) with polydimethylsiloxane (PDMS) coating, unless otherwise stated. <sup>b</sup> 1-chloro-3-methyl-2-butene precursor was used for the production of  $(\text{CH}_3)_2\text{CCHCH}_2$  radical, pyrex-glass reactor (id = 1.65 cm) with halocarbon wax coating. <sup>c</sup> Stainless steel reactor (id = 0.8 cm) with halocarbon wax coating.

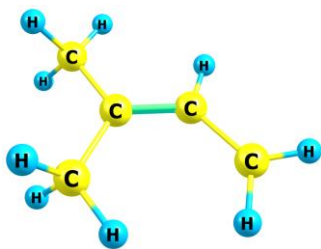

(R,  $\Delta H_{(298\text{K})} = 0 \text{ kcal mol}^{-1}$ )

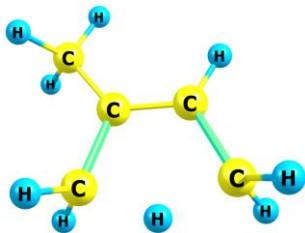

(TS1,  $\Delta H_{(298\text{K})} = 38.89$ )

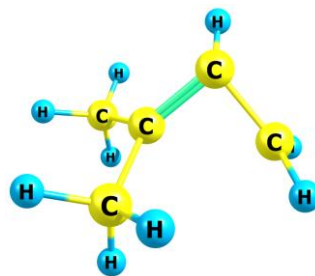

(TS2,  $\Delta H_{(298\text{K})} = 53.08$ )

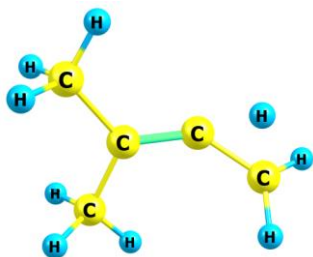

(TS3,  $\Delta H_{(298\text{K})} = 63.98$ )

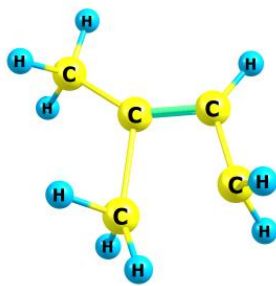

(TS4,  $\Delta H_{(298\text{K})} = 88.47$ )

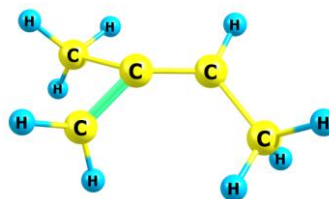

(TS5,  $\Delta H_{(298\text{K})} = 81.02$ )

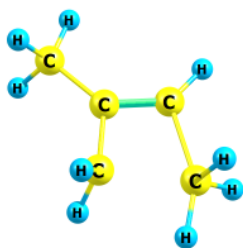

(TS6,  $\Delta H_{(298\text{K})} = 90.79$ )

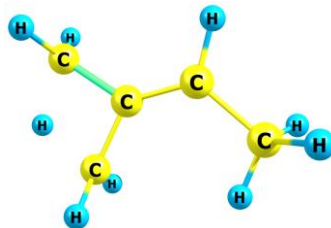

(TS7,  $\Delta H_{(298\text{K})} = 57.24$ )

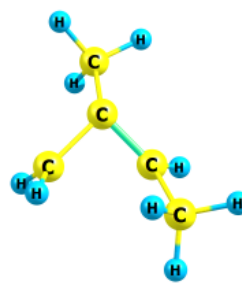

(TS8,  $\Delta H_{(298\text{K})} = 53.54$ )

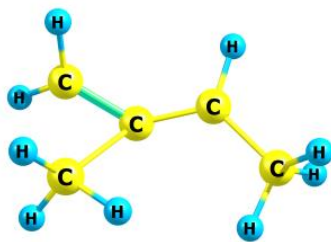

(TS9,  $\Delta H_{(298\text{K})} = 80.24$ )

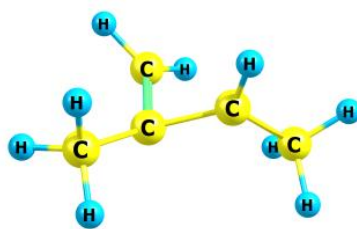

(TS10,  $\Delta H_{(298\text{K})} = 50.64$ )

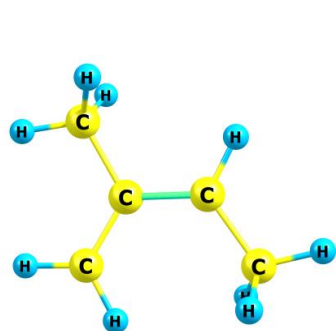

(I1,  $\Delta H_{(298\text{K})} = 2.10$ )

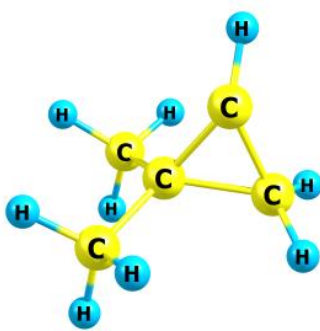

(I2,  $\Delta H_{(298\text{K})} = 28.25$ )

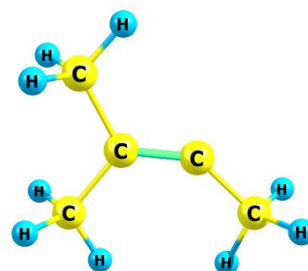

(I3,  $\Delta H_{(298\text{K})} = 22.86$ )

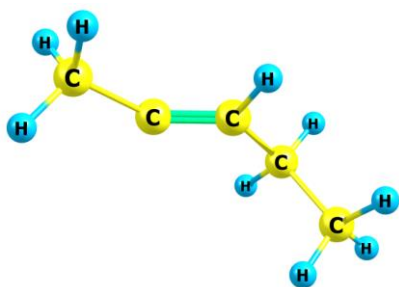

(I4,  $\Delta H_{(298\text{K})} = 25.61$ )

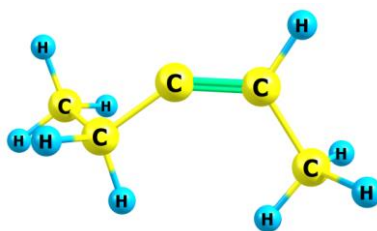

(I5,  $\Delta H_{(298\text{K})} = 26.56$ )

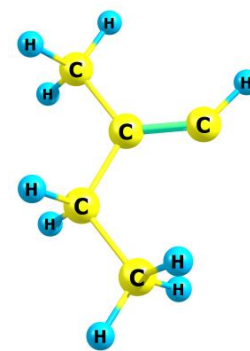

(I6,  $\Delta H_{(298\text{K})} = 28.28$ )

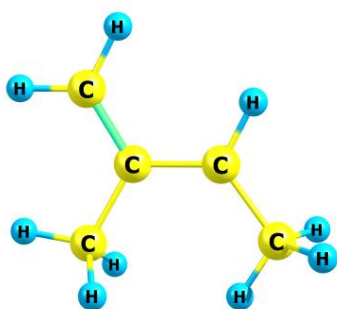

(I7,  $\Delta H_{(298\text{K})} = 1.83$ )

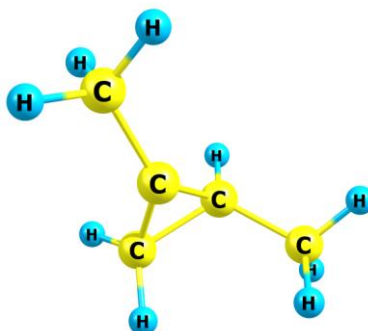

(I8,  $\Delta H_{(298\text{K})} = 26.28$ )

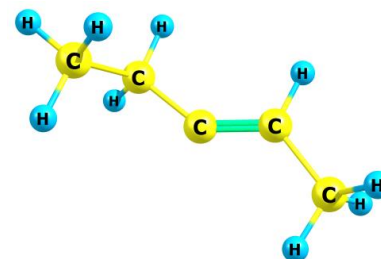

(I9,  $\Delta H_{(298\text{K})} = 25.94$ )

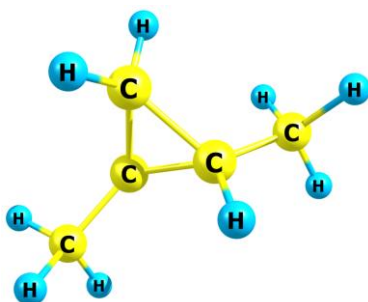

(I10,  $\Delta H_{(298\text{K})} = 26.28$ )

**Figure S1.** MN15/cc-pVTZ optimized geometries and  $\Delta H_{(298\text{K})}$  (kcal mol<sup>-1</sup>) values of the stationarity points associated with (CH<sub>3</sub>)<sub>2</sub>CCHCH<sub>2</sub> radical isomerization.

## Experimental uncertainty in the high-temperature range measurements

The Figure S2 below shows the bimolecular plot of reaction (1b) measured at  $T = 501$  K and  $P = 2.9$  Torr. It can be seen that the measured  $k'_{1b}$  values appear to show a more rapid rise in going from  $k_{wall}^{(R)}$  at  $[O_2] = 0$  to the slowest  $k'_{1b}$  decay with oxygen at  $[O_2] = 6.7 \times 10^{-15}$  molecule  $cm^{-3}$  than in going from this value to the fastest  $k'_{1b}$  decay with oxygen at  $[O_2] = 30 \times 10^{-15}$  molecule  $cm^{-3}$ . This first rise may be due to the heterogeneous wall processes. The linear fits were performed to the data sets that includes (solid red line) and excludes (solid blue line) the  $k_{wall}^{(R)}$  data-point and fits return the  $k_{1b}$  values  $2.8 \times 10^{-15}$   $cm^3$  molecule $^{-1}$  s $^{-1}$  and  $2.1 \times 10^{-15}$   $cm^3$  molecule $^{-1}$  s $^{-1}$ , respectively. Comparing these  $k_{1b}$  values give maximum uncertainty  $2.8 \times 10^{-15} / 2.1 \times 10^{-15} = 1.33$ , which gives  $\pm 33$  % uncertainty. In our high-temperature range measurements we often, but not always, observed similar behavior. We take a conservative approach and we estimate our experimental uncertainty to be factor of two, upper limit =  $2 \times k_{1b}$ , lower limit =  $0.5 \times k_{1b}$ , in our high-temperature range measurements.

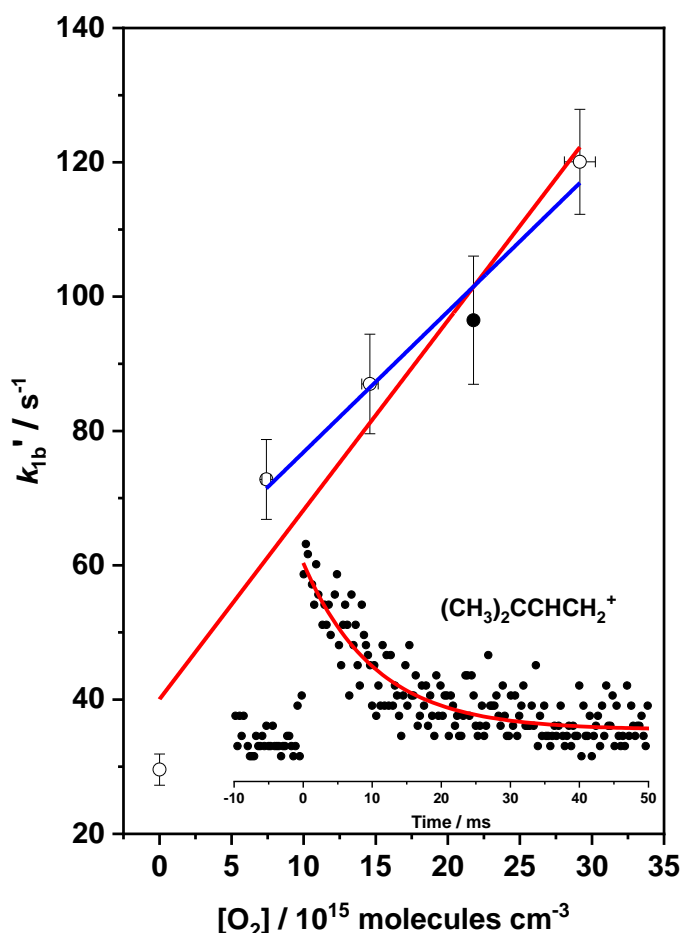

**Figure S2.** A bimolecular plot of  $(CH_3)_2CCHCH_2 + O_2 \rightarrow$  products reaction (1b), measured at  $T = 501$  K and  $P = 2.9$  Torr. The lower right corner of the plot depicts  $(CH_3)_2CCHCH_2$  radical decay profile ( $k'_{1b} = 96.5 \pm 9.5$  s $^{-1}$ , filled circle in the plot). The uncertainties shown are  $1\sigma$ . The solid red and blue line depicts the linear fits performed to the data that includes and excludes the  $k_{wall}^{(R)}$  data-point, respectively.

**Table S2.** The MN15/Def2TZVP and CCSD(T)/CBS//MN15/Def2TZVP energies (kcal/mol) of stationary points (relative to reactants R + O<sub>2</sub>) for (CH<sub>3</sub>)<sub>2</sub>CCHCH<sub>2</sub> (R) + O<sub>2</sub> reaction, along with their T1 diagnostic values and optimized geometries.

| Species            | $\Delta ZPE$ | MN15/Def2TZVP | ROHF-CCSD(T)/CBS | T1           | Structure                                                                             |
|--------------------|--------------|---------------|------------------|--------------|---------------------------------------------------------------------------------------|
| R + O <sub>2</sub> | 0            | 0             | 0                | 0.024, 0.017 | 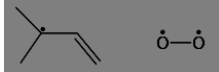   |
| P1                 | 1.08         | -2.96         | -3.08            | 0.011, 0.032 |    |
| P2                 | 0.0246       | -73.5         | -74.2            | 0.026, 0.013 |    |
| P3                 | 0.905        | -22.9         | -21.2            | 0.011, 0.013 |   |
| P4                 | 1.05         | -40.5         | -37.7            | 0.021, 0.013 |  |
| P5                 | 1.78         | -40.6         | -40.5            | 0.011, 0.013 |  |
| P6                 | 0.312        | -34.5         | -32.6            | 0.018, 0.015 |  |
| P7                 | -0.125       | -70.0         | -69.7            | 0.021, 0.015 |  |

| Species                          | $\Delta ZPE$ | MN15/Def2TZVP | ROHF-CCSD(T) / CBS | T1    | Structure                                                                             |
|----------------------------------|--------------|---------------|--------------------|-------|---------------------------------------------------------------------------------------|
| Int1NT<br>(ROO <sub>(nt)</sub> ) | 3.79         | -21.9         | -20.2              | 0.023 | 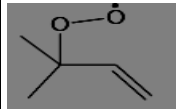 |

|                                |      |       |        |       |                                                                                       |
|--------------------------------|------|-------|--------|-------|---------------------------------------------------------------------------------------|
| Int1T<br>(ROO <sub>(t)</sub> ) | 4.28 | -20.1 | -17.6  | 0.023 | 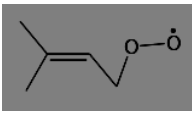   |
| Int2NT                         | 3.14 | -7.52 | -3.66  | 0.015 |    |
| Int2T                          | 3.50 | -18.0 | -15.3  | 0.023 |    |
| Int3T                          | 3.76 | -5.23 | 0.0200 | 0.015 |    |
| Int4                           | 3.82 | -22.2 | -18.1  | 0.014 |   |
| Int5NT                         | 4.28 | -49.7 | -      | -     |  |
| Int5T                          | 3.55 | -51.1 | -      | -     |  |

| Species | $\Delta ZPE$ | MN15/Def2TZV<br>P | ROHF-CCSD(T) /<br>CBS | T1    |
|---------|--------------|-------------------|-----------------------|-------|
| TS1T2TA | 0.810        | 3.32              | 6.35                  | 0.024 |
| TS1T2TB | 0.846        | 3.35              | 6.42                  | 0.022 |



|           |       |      |      |       |
|-----------|-------|------|------|-------|
| TS1NT2NTA | 2.55  | 7.23 | 10.1 | 0.037 |
| TS1NT2NTB | 2.49  | 6.40 | -    | -     |
| TS1NT4A   | 2.96  | 5.22 | 7.33 | 0.025 |
| TS1NT4B   | 2.74  | 8.97 | -    | -     |
| TS1NTP1   | 0.144 | 4.73 | 6.11 | 0.029 |
| TS1T3TA   | 3.03  | 6.70 | 10.4 | 0.033 |
| TS1T3TB   | 3.01  | 8.15 | -    | -     |
| TS1T4A    | 3.14  | 7.76 | 10.5 | 0.027 |
| TS1T4B    | 3.01  | 9.34 | -    | -     |
| TS2NT5NT  | 2.48  | 12.3 | -    | -     |
| TS2NTP2A  | 1.82  | 9.34 | -    | -     |
| TS2NTP2B  | 1.59  | 5.84 | -    | -     |
| TS2TP3    | 1.65  | 3.17 | 2.07 | 0.041 |
| TS2TP5    | 1.45  | 12.8 | 10.9 | 0.026 |
| TS3T5T    | 2.83  | 10.8 | -    | -     |
| TS3TP7A   | 1.78  | 12.1 | -    | -     |
| TS3TP7B   | 1.58  | 14.3 | -    | -     |
| TS4NT5NT  | 2.17  | 10.9 | -    | -     |
| TS4T5T    | 2.15  | 8.61 | -    | -     |

**Table S3.** The results of CASPT2/CBS//MN15/Def2TZVP calculations for the stationary points of  $(\text{CH}_3)_2\text{CCHCH}_2$  (R) +  $\text{O}_2$  reaction. Energies in units of kcal/mol.

| Species                                 | Active Space | CASPT2/CBS | ROHF-CCSD(T)/CBS<br>(T1 diagnostic) |
|-----------------------------------------|--------------|------------|-------------------------------------|
| P1 Channel                              | 13,11        |            |                                     |
| Int1NT (ROO <sub>(nt)</sub> )           |              | 0          | 0 (0.023)                           |
| TS1NTP1                                 |              | 22.8       | 26.3 (0.029)                        |
|                                         |              |            |                                     |
| P3 Channel                              | 9,9          |            |                                     |
| Int1T (ROO <sub>(t)</sub> )             |              | 0          | 0 (0.023)                           |
| Int2T                                   |              | -1.22      | 2.28 (0.024)                        |
| TS1T2TA                                 |              | 22.1       | 23.9 (0.024)                        |
| TS1T2TB                                 |              | 22.2       | 24.0 (0.022)                        |
| TS2TP3                                  |              | 12.4       | 19.6 (0.041)                        |
|                                         |              |            |                                     |
| Non-terminal four-membered ring channel | 9,9          |            |                                     |
| Int1NT (ROO <sub>(nt)</sub> )           |              | 0          | 0 (0.023)                           |
| Int2NT                                  |              | 15.4       | 16.5 (0.015)                        |
| ts1NT2NTA                               |              | 26.7       | 30.2 (0.037)                        |
| ts1NT2NTB                               |              | 27.6       | -                                   |
| ts2NT5NT                                |              | 29.4       | -                                   |
| ts2NTP2A                                |              | 28.2       | -                                   |
| ts2NTP2B                                |              | 31.2       | -                                   |
|                                         |              |            |                                     |
| Terminal four-membered ring channel     | 9,9          |            |                                     |
| Int1T (ROO <sub>(t)</sub> )             |              | 0          | 0 (0.023)                           |
| Int3T                                   |              | 15.9       | 17.6 (0.015)                        |
| TS1T3TA                                 |              | 26.1       | 27.9 (0.033)                        |
| TS1T3TB                                 |              | 25.6       | -                                   |
| TS3T5T                                  |              | 26.9       | -                                   |
| TS3TP7A                                 |              | 31.6       | -                                   |
| TS3TP7B                                 |              | 33.2       | -                                   |
|                                         |              |            |                                     |

|                               |     |        |              |
|-------------------------------|-----|--------|--------------|
| Five-membered ring channel    | 7,7 |        |              |
| Int1NT (ROO <sub>(nt)</sub> ) |     | 0      | 0 (0.023)    |
| Int1T (ROO <sub>(t)</sub> )   |     | 3.04   | 2.61 (0.023) |
| Int4                          |     | 0.0400 | 2.09 (0.014) |
| ts1NT4A                       |     | 24.9   | 27.5 (0.025) |
| ts1NT4B                       |     | 28.7   | -            |
| ts1T4A                        |     | 28.3   | 30.7 (0.027) |
| ts1T4B                        |     | 29.9   | -            |
| ts4NT5NT                      |     | 27.0   | -            |
| ts4T5T                        |     | 25.5   | -            |
